# Supplementary material for: The concurrent validity and reliability of the Leg Motion system for measuring ankle dorsiflexion range of motion in older adults
Source: PeerJ journal article supplement (doi:10.7717/peerj.2820), 2017-01-03
Supplement: LegMotionDatabase_Hoja1.pdf [file LegMotionDatabase_Hoja1.pdf]

| Nombre | Height     | Weight     | BMI        | 1     |
|--------|------------|------------|------------|-------|
|        |            |            |            | Right |
| 1      | 1,79       | 90         | 28,089011  | 6.0   |
| 2      | 1,58       | 49         | 19,6282647 | 1.9   |
| 3      | 1,62       | 51         | 19,4330133 | 3.6   |
| 4      | 1,77       | 62         | 19,789971  | 4.4   |
| 5      | 1,73       | 80         | 26,7299275 | 7.8   |
| 6      | 1,57       | 69         | 27,993022  | 1.5   |
| 7      | 1,45       | 66         | 31,391201  | 10.0  |
| 8      | 1,8        | 85         | 26,2345679 | 3.5   |
| 9      | 1,61       | 61         | 23,5330427 | 8.5   |
| 10     | 1,57       | 49         | 19,8791026 | 1.5   |
| 11     | 1,65       | 66         | 24,2424242 | 2.6   |
| 12     | 1,73       | 82         | 27,3981757 | 7.5   |
| 13     | 1,59       | 63         | 24,9199003 | 1.5   |
| 14     | 1,66       | 55         | 19,9593555 | 4.7   |
| 15     | 1,53       | 51         | 21,7864924 | 1.5   |
| 16     | 1,62       | 52         | 19,8140527 | 6.6   |
| 17     | 1,86       | 94         | 27,1707712 | 11.5  |
| 18     | 1,62       | 73         | 27,8158817 | 6.9   |
| 19     | 1,63       | 71         | 26,7228725 | 1.4   |
| 20     | 1,91       | 79         | 21,6551081 | 6.6   |
| 21     | 1,84       | 79         | 23,334121  | 9.5   |
| 22     | 1,63       | 52         | 19,5716813 | 7.7   |
| 23     | 1,71       | 62         | 21,2031052 | 1.9   |
| 24     | 1,8        | 91         | 28,0864198 | 3.4   |
| 25     | 1,62       | 66         | 25,1486054 | 2.5   |
| 26     | 1,67       | 57         | 20,4381656 | 9.3   |
| 27     | 1,58       | 62         | 24,8357635 | 3.4   |
| 28     | 1,66       | 79         | 28,6688924 | 5.5   |
| 29     | 1,59       | 55         | 21,7554685 | 10.0  |
| 30     | 1,72       | 83         | 28,0557058 | 1.7   |
| 31     | 1,65       | 60         | 22,0385675 | 1.5   |
| 32     | 1,63       | 72         | 27,099251  | 5.8   |
| 33     | 1,75       | 86         | 28,0816327 | 4.5   |
|        | 1,67090909 | 68,2424242 | 24,318289  | Media |
|        | 0,10229747 | 13,4722639 | 3,50310418 | DT    |

| Leg Motion |       |      | Tape Measure |      |       |      |
|------------|-------|------|--------------|------|-------|------|
| 1          | 2     |      | 1            |      | 2     |      |
| Left       | Right | Left | Right        | Left | Right | Left |
| 5.5        | 5.0   | 6.8  | 5.0          | 6.0  | 4.6   | 5.5  |
| 4.0        | 1.5   | 3.2  | 2.2          | 4.5  | 2.4   | 3.6  |
| 4.6        | 3.0   | 4.5  | 3.4          | 5.0  | 3.6   | 5.0  |
| 5.7        | 5.0   | 5.2  | 4.9          | 4.8  | 4.6   | 5.9  |
| 6.5        | 6.5   | 7.2  | 8.5          | 6.9  | 7.5   | 6.0  |
| 1.4        | 2.2   | 1.7  | 1.8          | 1.5  | 1.4   | 1.5  |
| 7.8        | 9.3   | 7.0  | 10.0         | 6.5  | 10.0  | 7.4  |
| 2.5        | 4.4   | 3.0  | 4.5          | 2.0  | 3.9   | 2.9  |
| 7.6        | 7.8   | 7.0  | 7.5          | 7.1  | 8.0   | 7.5  |
| 2.0        | 2.0   | 2.0  | 1.8          | 2.6  | 2.0   | 2.3  |
| 4.0        | x     | x    | 3.0          | 3.5  | x     | x    |
| 9.0        | 6.8   | 9.2  | 6.5          | 8.9  | 6.7   | 9.0  |
| 3.0        | 2.0   | 3.0  | 1.5          | 3.0  | 1.5   | 3.2  |
| 7.5        | 5.0   | 7.5  | 4.5          | 6.8  | 4.5   | 7.4  |
| 1.8        | x     | x    | 2.5          | 2.1  | x     | x    |
| 5.3        | 7.0   | 5.8  | 6.2          | 5.8  | 5.9   | 6.3  |
| 12.5       | 12.2  | 12.5 | 12.0         | 11.0 | 12.5  | 12.5 |
| 5.0        | 6.0   | 5.4  | 6.2          | 5.3  | 7.5   | 5.0  |
| 1.1        | 1.5   | 1.2  | 1.6          | 1.3  | 1.5   | 1.3  |
| 7.5        | 5.5   | 7.9  | 5.8          | 8.0  | 6.0   | 8.2  |
| 10.2       | 10.5  | 9.5  | 9.0          | 11.0 | 9.6   | 10.5 |
| 8.2        | x     | x    | 8.1          | 8.6  | x     | x    |
| 2.5        | 2.0   | 3.0  | 2.0          | 3.1  | 2.2   | 2.1  |
| 4.5        | 2.4   | 4.0  | 2.5          | 3.9  | 2.2   | 4.0  |
| 1.5        | 2.5   | 2.4  | 2.5          | 1.9  | 3.5   | 2.5  |
| 7.5        | 9.3   | 6.8  | 9.2          | 6.8  | 9.5   | 6.7  |
| 2.5        | 4.0   | 2.5  | 4.0          | 2.0  | 5.1   | 3.0  |
| 4.0        | 5.5   | 4.5  | 6.2          | 4.5  | 5.5   | 4.5  |
| 9.5        | 10.5  | 8.7  | 11.5         | 9.4  | 11.4  | 9.4  |
| 3.0        | 2.0   | 3.0  | 1.5          | 3.0  | 1.4   | 3.0  |
| 1.7        | 1.5   | 2.5  | 1.8          | 2.5  | 1.9   | 3.3  |
| 7.8        | 4.4   | 7.0  | 5.0          | 7.0  | 5.5   | 7.2  |
| 2.5        | 4.9   | 2.0  | 4.5          | 1.5  | 4.7   | 1.5  |

| Goniometer |      |       |      | Inclinometer |      |       |
|------------|------|-------|------|--------------|------|-------|
| 1          |      | 2     |      | 1            |      | 2     |
| Right      | Left | Right | Left | Right        | Left | Right |
| 47         | 48   | 42    | 42   | 54           | 46   | 43    |
| 49         | 51   | 46    | 46   | 52           | 44   | 44    |
| 42         | 39   | 46    | 40   | 49           | 43   | 50    |
| 45         | 47   | 42    | 45   | 46           | 42   | 49    |
| 41         | 47   | 41    | 45   | 47           | 40   | 49    |
| 48         | 49   | 47    | 53   | 38           | 48   | 45    |
| 39         | 47   | 42    | 51   | 48           | 44   | 46    |
| 49         | 52   | 53    | 47   | 47           | 44   | 45    |
| 44         | 42   | 40    | 37   | 35           | 37   | 37    |
| 57         | 50   | 54    | 47   | 46           | 50   | 52    |
| 49         | 44   | x     | x    | 44           | 42   | x     |
| 46         | 43   | 44    | 44   | 55           | 49   | 50    |
| 54         | 52   | 50    | 49   | 55           | 46   | 51    |
| 44         | 41   | 42    | 46   | 40           | 48   | 43    |
| 46         | 48   | x     | x    | 48           | 55   | x     |
| 42         | 47   | 46    | 49   | 47           | 40   | 40    |
| 38         | 32   | 43    | 31   | 46           | 39   | 49    |
| 42         | 46   | 44    | 50   | 45           | 45   | 42    |
| 57         | 59   | 50    | 52   | 44           | 59   | 49    |
| 41         | 36   | 48    | 42   | 40           | 37   | 42    |
| 37         | 35   | 32    | 42   | 45           | 41   | 41    |
| 42         | 39   | x     | x    | 45           | 43   | x     |
| 49         | 42   | 46    | 48   | 48           | 47   | 45    |
| 44         | 48   | 40    | 52   | 49           | 39   | 49    |
| 51         | 44   | 45    | 46   | 44           | 51   | 48    |
| 44         | 49   | 48    | 42   | 44           | 42   | 42    |
| 48         | 51   | 42    | 46   | 52           | 43   | 44    |
| 47         | 45   | 39    | 42   | 43           | 52   | 46    |
| 42         | 46   | 44    | 49   | 50           | 49   | 48    |
| 46         | 44   | 42    | 44   | 47           | 48   | 48    |
| 49         | 47   | 55    | 52   | 41           | 55   | 46    |
| 44         | 42   | 42    | 47   | 50           | 48   | 45    |
| 50         | 44   | 44    | 41   | 49           | 42   | 48    |

|      |
|------|
|      |
|      |
| Left |
| 44   |
| 45   |
| 49   |
| 45   |
| 46   |
| 53   |
| 44   |
| 52   |
| 39   |
| 45   |
| x    |
| 54   |
| 51   |
| 41   |
| x    |
| 42   |
| 46   |
| 51   |
| 57   |
| 39   |
| 39   |
| x    |
| 41   |
| 44   |
| 47   |
| 40   |
| 46   |
| 53   |
| 51   |
| 45   |
| 58   |
| 49   |
| 41   |
